# Supplementary material for: Stripping voltammetric detection of copper ions using carbon paste electrode modified with aza-crown ether capped gold nanoparticles and reduced graphene oxide
Source: Royal Society of Chemistry journal article supplement (doi:10.1039/c6ra10267k), 2016-01-01
Supplement: c6ra10267k1.pdf [file c6ra10267k1.pdf]

## Supporting Information

# Stripping voltammetric detection of copper ions using carbon paste electrode modified with aza-crown ether capped gold nanoparticles and reduced graphene oxide

M. Ghanei-Motlagh<sup>a,\*</sup>, Ch. Karami<sup>b</sup>, M.A. Taher<sup>c</sup>, S. J. Hosseini-Nasab<sup>d</sup>

<sup>a</sup>Young Researchers and Elite Club, Kerman Branch, Islamic Azad University, Kerman, Iran

<sup>b</sup>Department of Chemistry, Kermanshah Branch, Islamic Azad University, Kermanshah, Iran

<sup>c</sup>Department of Chemistry, Faculty of Sciences, Shahid Bahonar University of Kerman, Kerman, Iran

<sup>d</sup>Department of Chemistry, Science and Research Branch, Islamic Azad University, Tehran, Iran

*Corresponding author;*

*E-mail: m.ghaneimotlagh@yahoo.com (Masoud Ghanei-Motlagh)*

### Table of contents

|                 |   |
|-----------------|---|
| Figure S1 ..... | 2 |
| Figure S2 ..... | 3 |

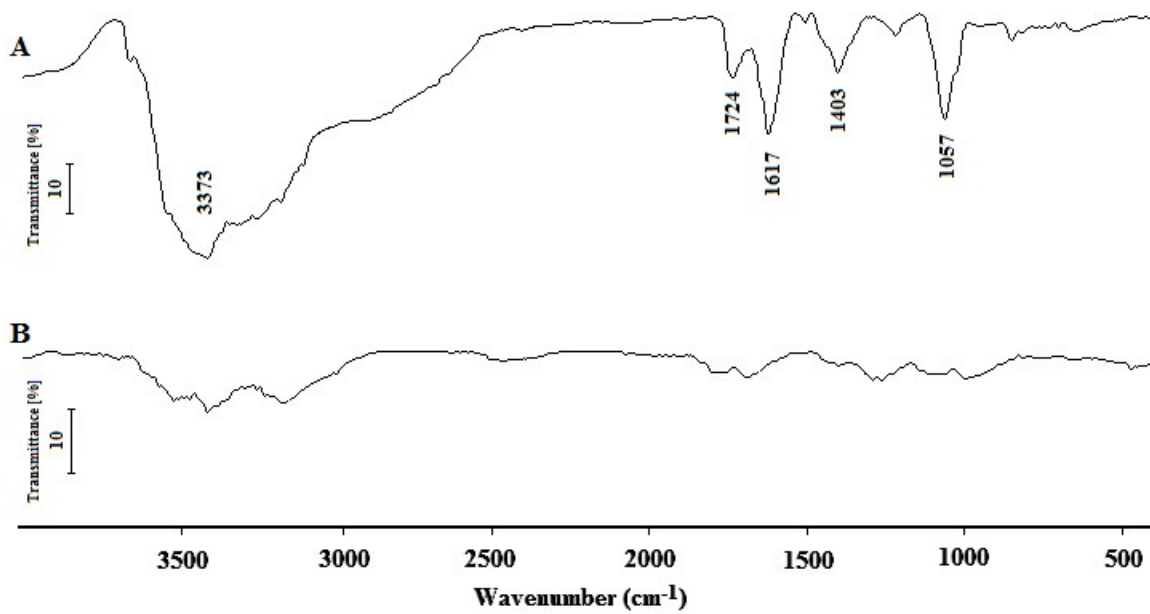

**Figure S1.** FT-IR spectra of (A) GO and (B) RGO nano sheets.

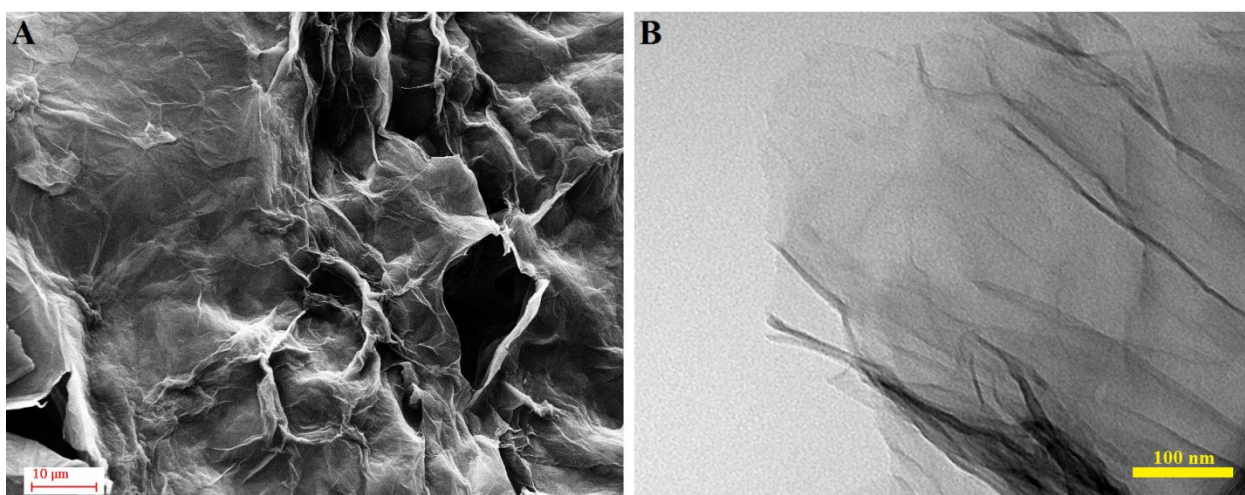

**Figure S2.** SEM image (A) and TEM image (B) of the prepared RGO nano sheets.
